# Supplementary material for: A nanoplasmonic label-free surface-enhanced Raman scattering strategy for non-invasive cancer genetic subtyping in patient samples
Source: Royal Society of Chemistry journal article supplement (doi:10.1039/c6nr09928a), 2017-01-01
Supplement: c6nr09928a1.pdf [file c6nr09928a1.pdf]

*Supplementary Information*

**Nanoplasmonic label-free surface-enhanced Raman  
scattering strategy for non-invasive cancer genetic  
subtyping in patient samples**

Jing Wang<sup>1,‡</sup>, Kevin M. Koo<sup>1,‡</sup>, Eugene J. H. Wee<sup>1,\*</sup>, Yuling Wang<sup>1,\*</sup> & Matt Trau<sup>1,2,\*</sup>

<sup>1</sup>Centre for Personalised Nanomedicine, Australian Institute for Bioengineering and Nanotechnology, University of Queensland, Brisbane, QLD 4072, Australia

<sup>2</sup>School of Chemistry and Molecular Biosciences, University of Queensland, Brisbane, QLD 4072, Australia

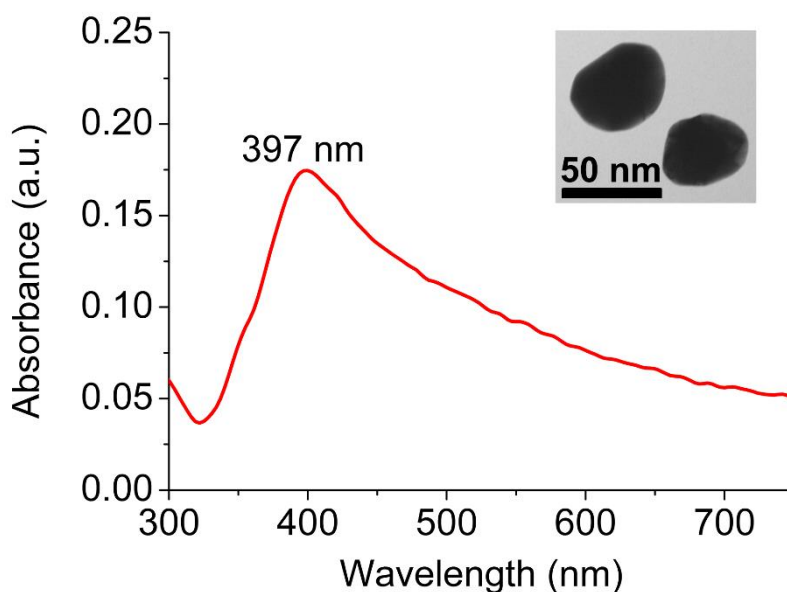

**Fig. S1.** UV-Vis absorption spectrum of AgNPs. The maximum absorption locates at 397 nm. The insert is the corresponding TEM image.

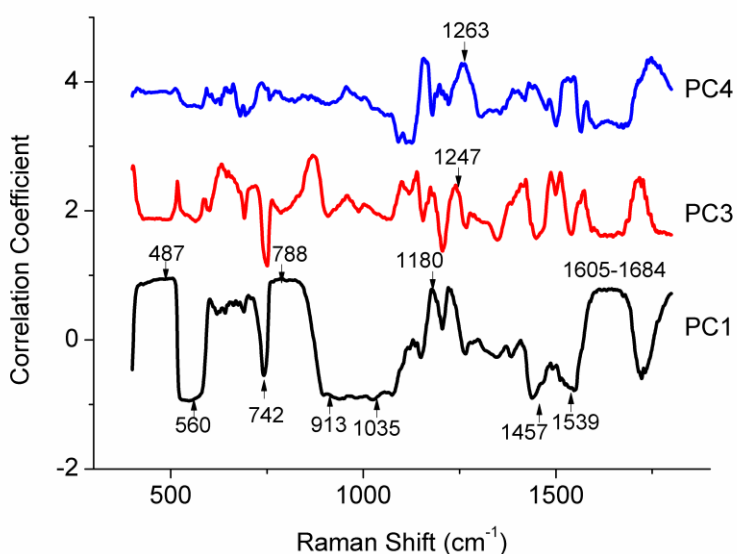

**Fig. S2.** Calculated correlation coefficient profiles of three diagnostically significant principal components (PCs) from a data set composed by 43 T1E4 and 43 RN7SL1 SERS spectra. Each PC revealed diagnostically significant spectral features ( $p < 0.001$ ) for the discrimination between T1E4 and RN7SL1 RNA biomarkers.

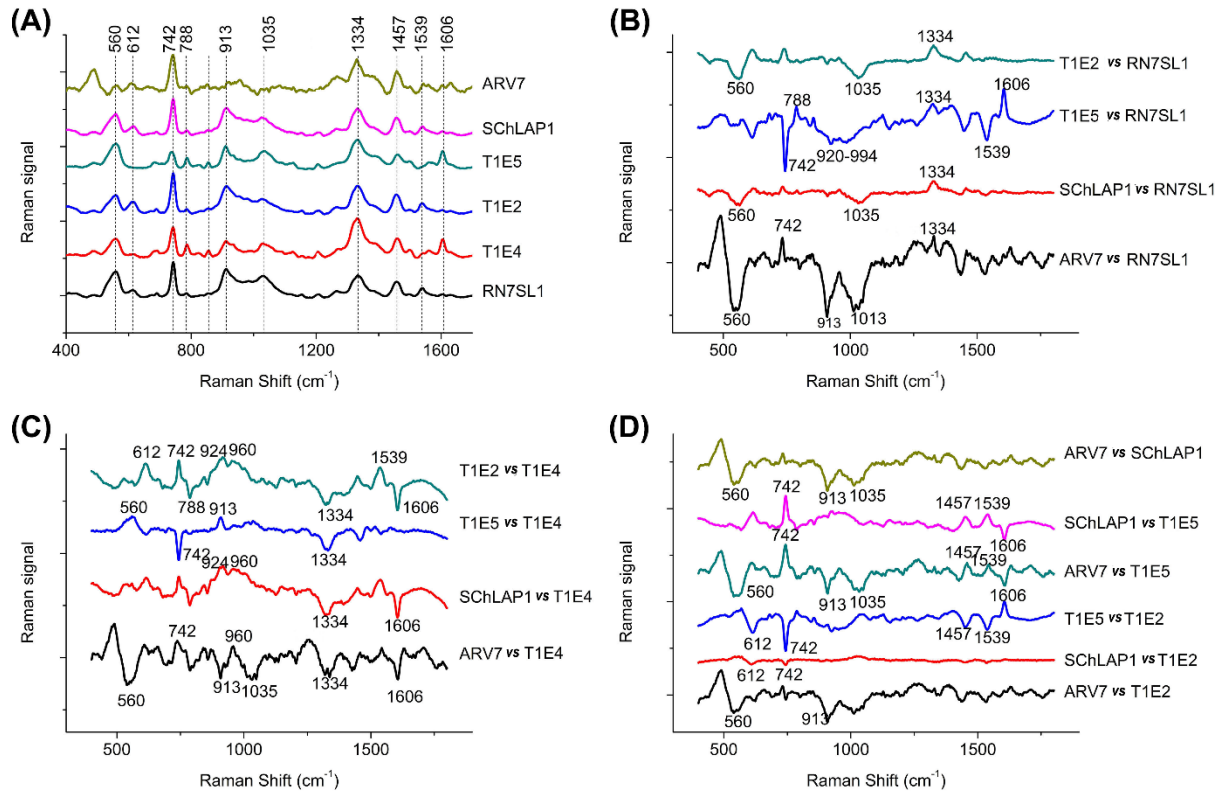

**Fig. S3.** (A) SERS spectra of various target RNA biomarkers isolated from patient unary samples ( $n = 3$ ), including ARV7, SChLAP1, fusion genes between *TPMRSS2* exon 1 and *ERG* exon 5 (T1E5), *TPMRSS2* exon 1 and *ERG* exon 2 (T1E2), *TPMRSS2* exon 1 and *ERG* exon 4 (T1E4), and RN7SL1. Dotted lines indicate spectral positions for differentiating the distinct SERS signatures of each individual target. (B-D) Difference spectra obtained by digital subtraction between each combination pairs of target RNA signals.
